# Supplementary material for: Reducing Sialylation Enhances Electrotaxis of Corneal Epithelial Cells
Source: MDPI journal article supplement (doi:10.3390/ijms241814327), 2023-09-20
Supplement: s1 [file s1]

### Supplementary Materials:

This manuscript contains four supplementary videos and one supplementary figure:

Supplementary Video S1: hTCEpi cells under 100mV/mm with and without 3F-Neu5Ac (100 $\mu$ M).

Supplementary Video S2: hTCEpi cells under 30mV/mm with and without 3F-Neu5Ac (100 $\mu$ M).

Supplementary Video S3: hTCEpi cells under 100mV/mm with and without Ac<sub>4</sub>ManNAz (100 $\mu$ M).

Supplementary Video S4: hTCEpi cells under 100mV/mm with and without Kifunensine (20 $\mu$ g/ml).

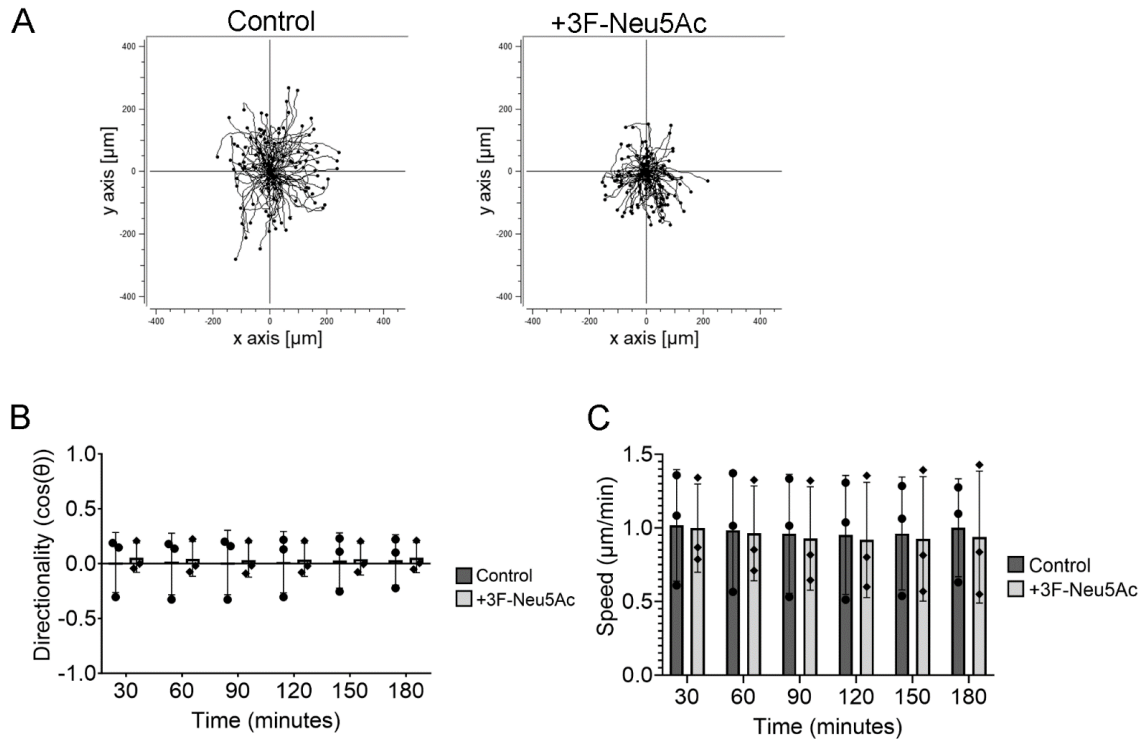

**Supplementary Figure S1. 3F-Neu5Ac does not impact cell migration in the absence of an electric field.** hTCEpi cells were seeded into electrotactic chambers and pretreated with 100  $\mu$ M of 3F-Neu5Ac for 48 hours before electrical stimulation. (A) Representative trajectory plots of hTCEpi cells treated with or without 3F-Neu5Ac. (B) Quantification of directionality and speed (n=3). (C) Quantification of speed (n=3).
