# Supplementary material for: Reducing Sialylation Enhances Electrotaxis of Corneal Epithelial Cells
Source: MDPI journal article supplement (doi:10.3390/ijms241814327), 2023-09-20
Supplement: s1 [file s1]

Archive with 5 entries (5 files):
- ijms-2603645-supplementary/ijms-2603645-supplementary.pdf
- ijms-2603645-supplementary/VideoS1_Control_vs_3F_100mV-mm.avi
- ijms-2603645-supplementary/VideoS2_Control_vs_3F_30mV-mm.avi
- ijms-2603645-supplementary/VideoS3_Control_vs_Ac4ManNAz_100mV-mm.avi
- ijms-2603645-supplementary/VideoS4_Control_vs_Kifunensine_100mV-mm.avi
